# Supplementary figures and images for: The Association of the Pulmonary Artery Pulsatility Index and Right Ventricular Function after Cardiac Surgery
Source: Hindawi journal article supplement (doi:10.1155/2024/5408008), 2024-02-13

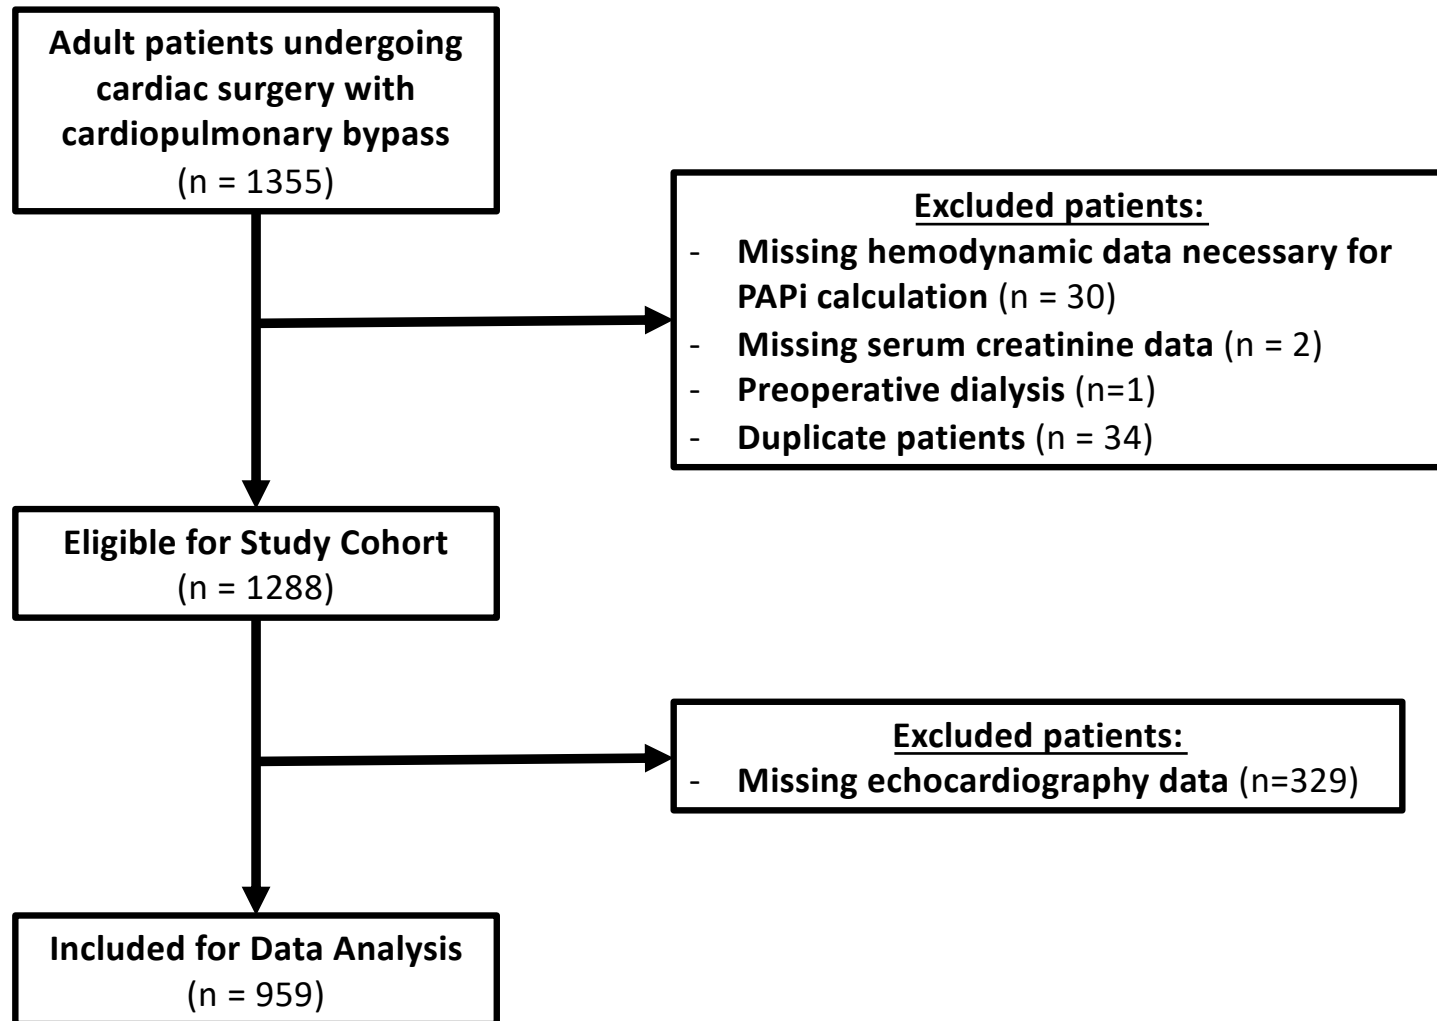

Supplement: f1 [file 5408008.f1.zip]

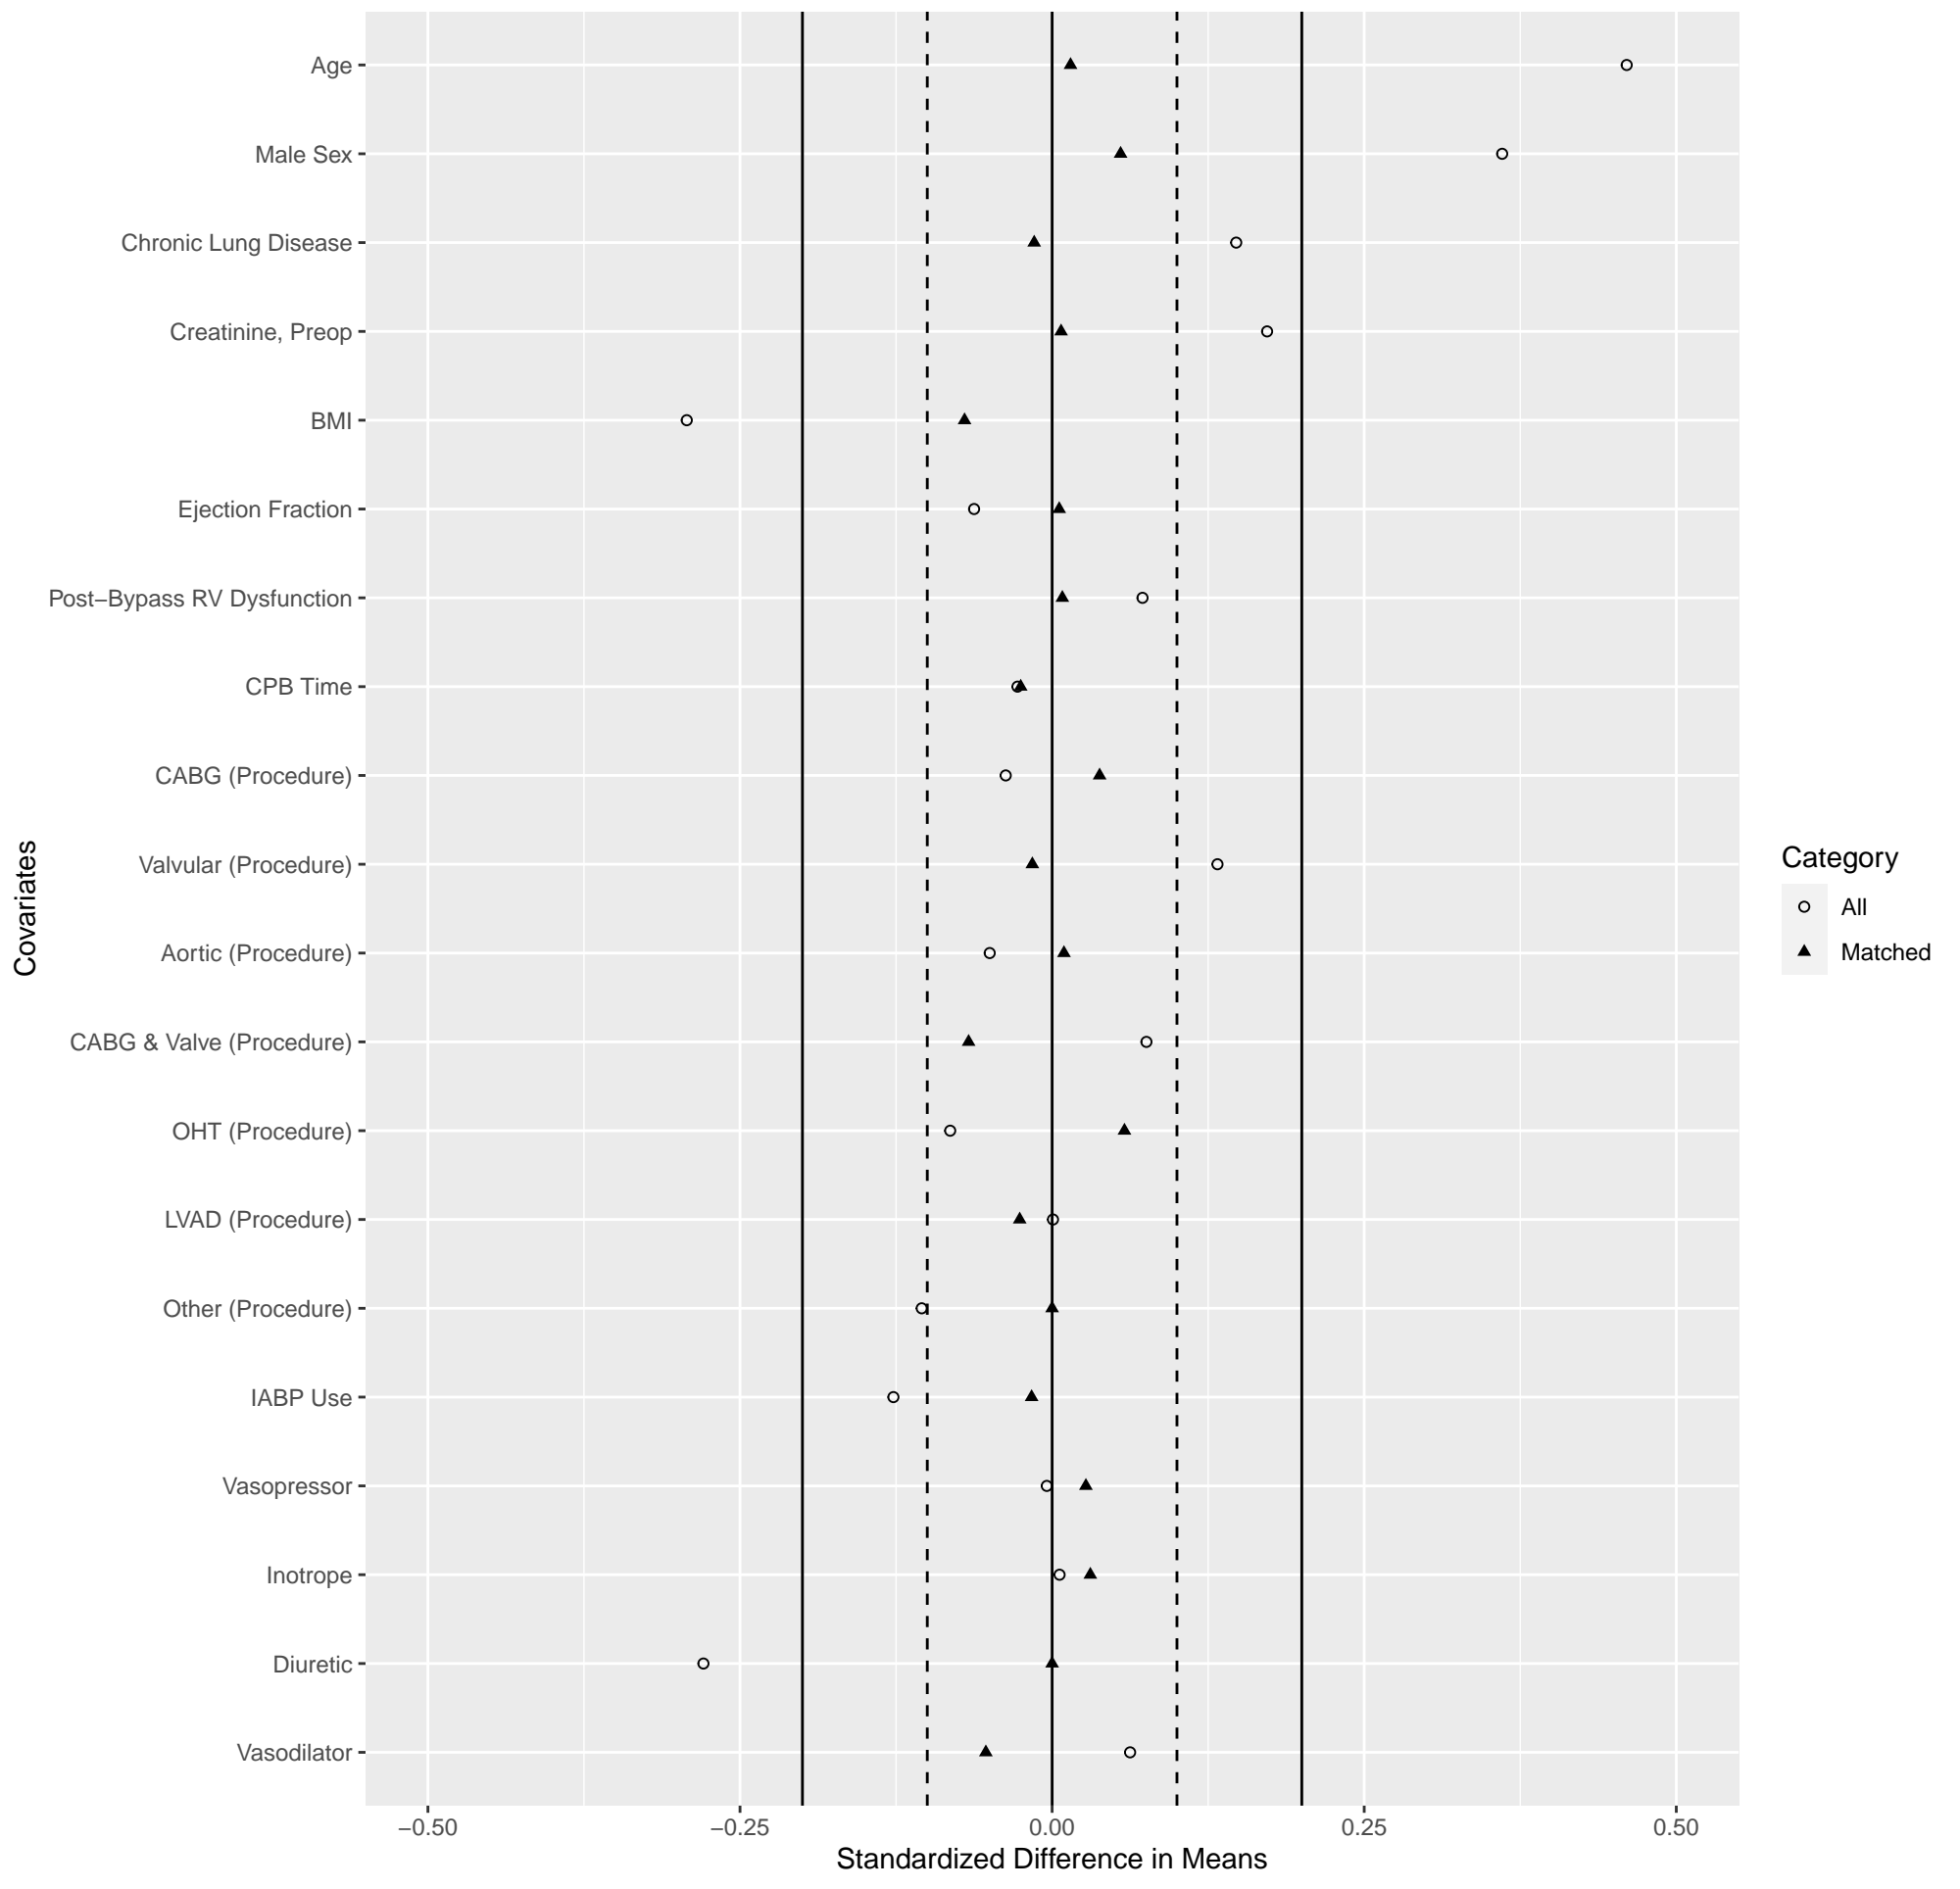

Supplement: f1 [file 5408008.f1.zip]

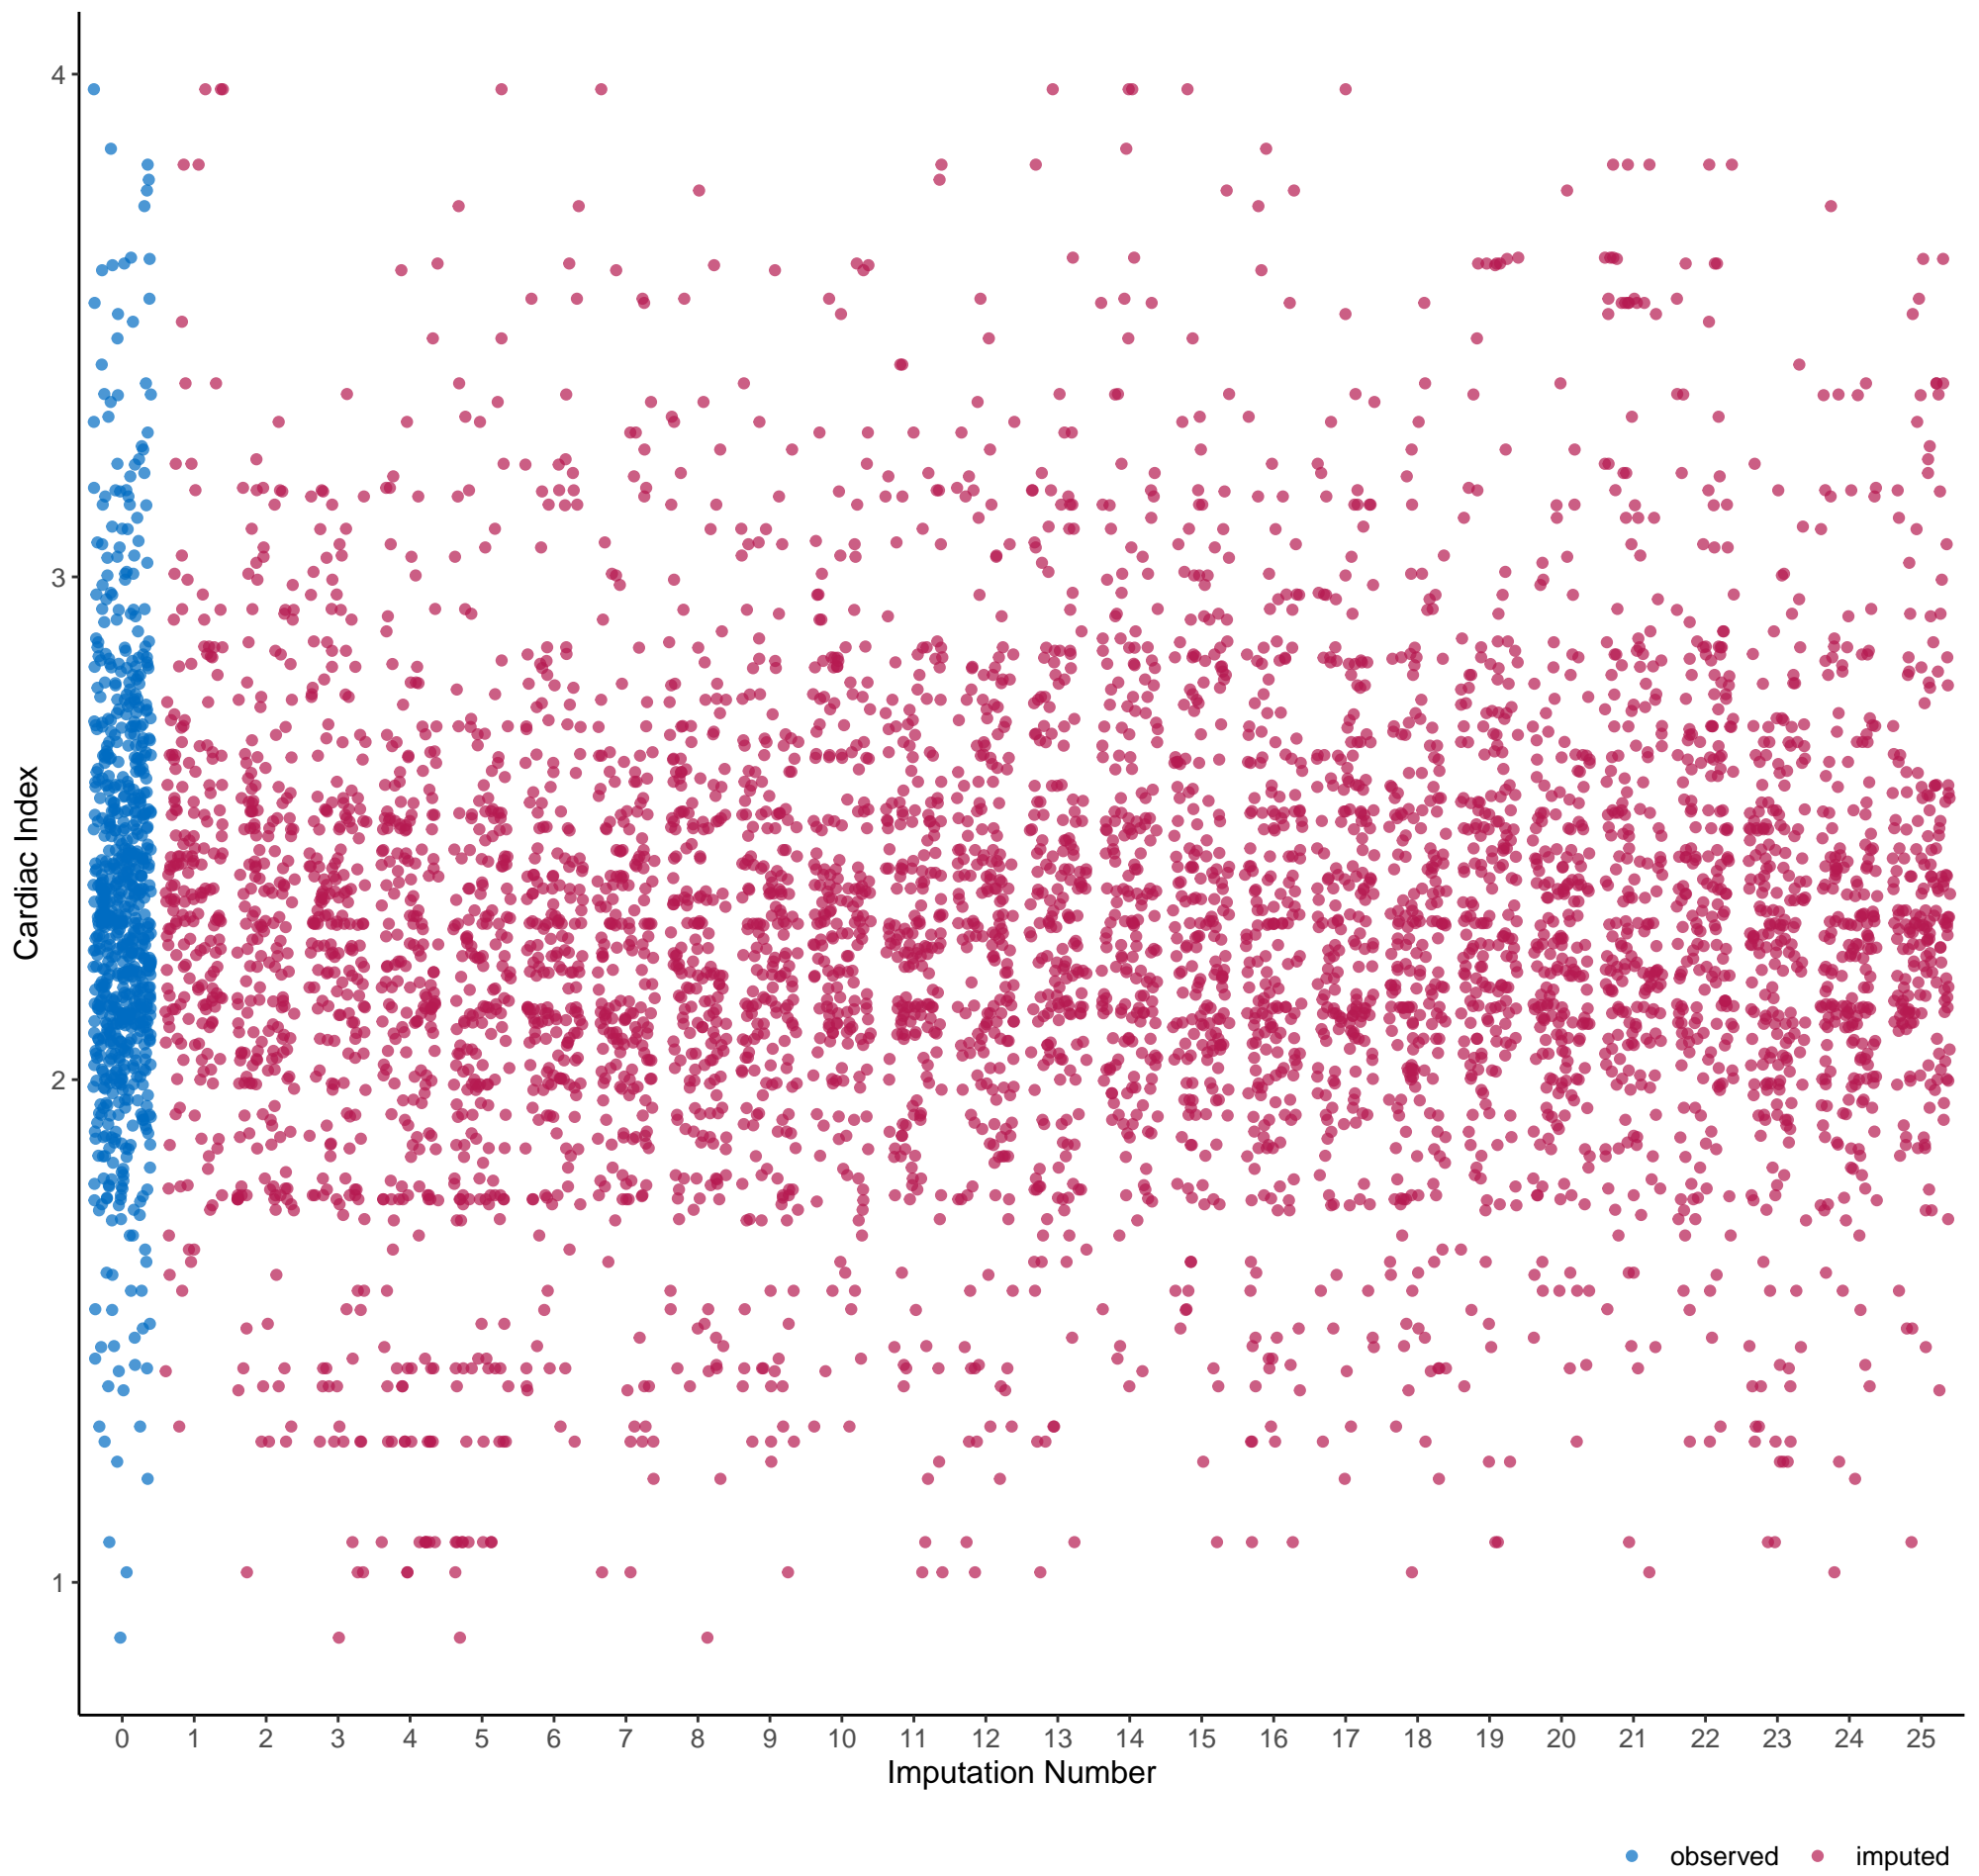

Supplement: f1 [file 5408008.f1.zip]
